# Supplementary material for: Experience Recruits MSK1 to Expand the Dynamic Range of Synapses and Enhance Cognition
Source: J Neurosci. 2020 Jun 10;40(24):4644–60. doi: 10.1523/JNEUROSCI.2765-19.2020 (PMC7294801; doi:10.1523/JNEUROSCI.2765-19.2020)
Supplement: Table 7-7. [file ns-JN-RM-2765-19-s06.xlsx]

## Sheet: 7-7 DEGs_Common post-EE
1	Krt8
2	Sema3b
3	Slc16a8
4	Gm44250
5	Rdh5
6	Oca2
7	Dab2
8	Mdfic
9	Slc13a4
10	Slc37a2
11	Slc4a2
12	Col17a1
13	Tuba1c
14	Cab39l
15	Perp
16	Wfikkn2
17	Slc31a1
18	Crhr2
19	Pon3
20	Col4a4
21	Col8a2
22	Drc7
23	Large2
24	Cdkn1c
25	Ppp1r3b
26	Bmp6
27	Ace
28	Tmprss11a
29	Nid2
30	Ccdc108
31	Epn3
32	Pcolce
33	Serpinb1b
34	Sulf1
35	Acaa2
36	Cd59a
37	Rbp1
38	Col8a1
39	Igf2
40	Ephx1
41	Tmem98
42	Calml4
43	Elovl7
44	Acacb
45	Itpripl1
46	Cox8b
47	Col4a3
48	Vamp8
49	Il17re
50	Tbc1d2
51	Cndp1
52	Mycbpap
53	Fap
54	Lbp
55	Ucp2
56	Igfbp2
57	Efemp2
58	Slc16a12
59	Cgnl1
60	Rd3
61	Prlr
62	Zfp185
63	Glb1l2
64	Gm45396
65	Ctnnal1
66	Pcolce2
67	Hfe
68	Slc16a9
69	Cdr2
70	Cox6b2
71	Mpp7
72	Rab11fip1
73	Vwa5b1
74	Bmp7
75	Fam161a
76	Spint2
77	Baiap2l1
78	Iqub
79	Cpq
80	Slc2a12
81	Enpp2
82	Kl
83	Defb11
84	Tcn2
85	Fhad1
86	Msx1
87	Eps8l2
88	Sult1c2
89	Col9a3
90	Frem1
91	Rsph1
92	Gprc5c
93	Scara5
94	Krt18
95	Pla2g5
96	Trpv4
97	Cldn1
98	Llgl2
99	Wdr63
100	Abca4
101	Tgfbi
102	Arhgef5
103	Car14
104	Tmem184a
105	1500015O10Rik
106	Slc39a4
107	Lama5
108	Olfr1507
109	Vat1l
110	Lepr
111	Hspb8
112	Sowahc
113	Frrs1
114	Mlf1
115	Crb2
116	Steap2
117	Tc2n
118	Tbc1d9
119	Arhgap28
120	Ezr
121	Slc6a20a
122	Col18a1
123	Gm26684
124	B4galt1
125	Fzd4
126	Pifo
127	Rilp
128	Htr2c
129	A2m
130	Gpx8
131	Sod3
132	Sostdc1
133	Otx2os1
134	Galm
135	Tcaf2
136	Abhd2
137	Fam47e
138	Sh3d19
139	Cldn2
140	Rbm47
141	Myof
142	Acss3
143	4930511M06Rik
144	Ltbp3
145	Slc28a3
146	Gm28729
147	F11r
148	Piezo1
149	Mitf
150	Prrg4
151	Foxj1
152	Col1a2
153	Trpm3
154	Ackr4
155	Gm11744
156	Angptl2
157	Lgals3bp
158	Fam46c
159	Tekt1
160	Sfrp5
161	Tjp3
162	Six3os1
163	Car12
164	Slc7a10
165	Myo7a
166	Scube3
167	Emb
168	Tns1
169	Plscr2
170	St6galnac2
171	Dnajb13
172	Dnah11
173	Rs1
174	Sntb1
175	Ccdc170
176	Sfrp1
177	Thbs1
178	Tinagl1
179	Bcam
180	Esrrb
181	H2-Aa
182	Mrc2
183	Dmrt3
184	Acox2
185	BC067074
186	Tgfbr3
187	Mmp2
188	Slc25a13
189	Hspg2
190	Col4a5
191	Csrp2
192	Ogn
193	Sgms2
194	Tspo
195	Ripk4
196	Col1a1
197	Serinc2
198	Trp73
199	Coch
200	Pdgfd
201	Atp7a
202	Map3k15
203	Cish
204	H2-Ab1
205	Fbln1
206	Strip2
207	Nt5e
208	Car13
209	Slc12a7
210	Angpt2
211	Parp3
212	Mansc4
213	Ppp1r1b
214	Lrriq1
